# Supplementary material for: A green approach to offset the perturbation action of 1-butyl-3-methylimidazolium iodide on α-chymotrypsin
Source: Royal Society of Chemistry journal article supplement (doi:10.1039/c4cp04180a), 2014-10-24
Supplement: c4cp04180a1.pdf [file c4cp04180a1.pdf]

## A green approach to offset the perturbation action of 1-butyl-3-methylimidazolium iodide on $\alpha$ -chymotrypsin

P. Madhusudhana Reddy, R. Umapathi and P. Venkatesu\*

Department of Chemistry, University of Delhi, Delhi-110 007, India.

E-mail: venkatesup@hotmail.com; pvenkatesu@chemistry.du.ac.in (P. Venkatesu)

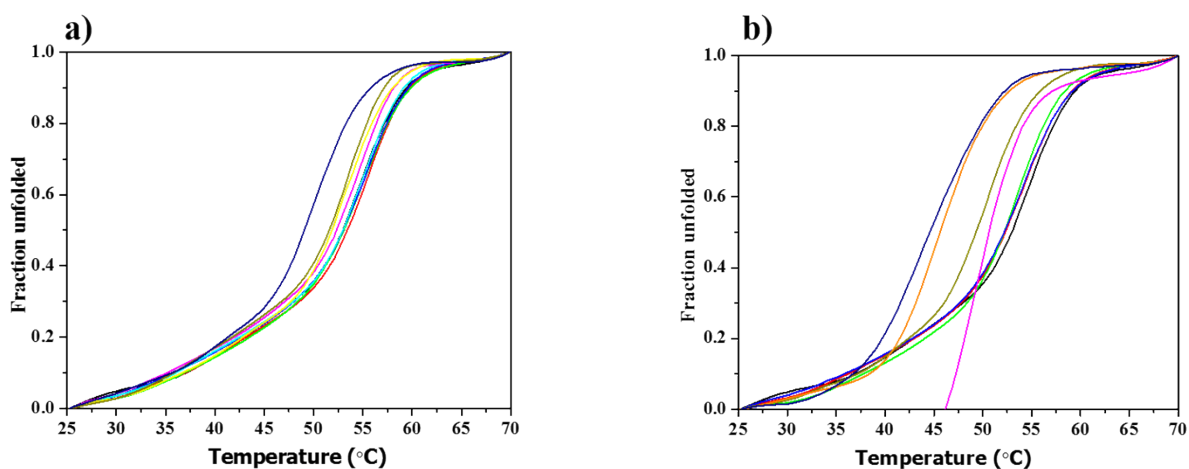

**Fig. S1** Fraction of unfolded  $\alpha$ -chymotrypsin (CT) in tris-HCl buffer in the presence of [Bmim][Br] (a); [Bmim][I] (b). The black, red, green, blue, cyan, magenta, yellow, dark yellow and navy color lines represent CT in buffer, 0.025, 0.05, 0.1, 0.15, 0.2, 0.25, 0.3 and 0.6 M, respectively, of [Bmim][Br] in panel a; black, red, green, blue, magenta, dark yellow, orange and navy color lines represent CT in buffer, 0.025, 0.05, 0.1, 0.2, 0.3, 0.4 and 0.6 M, respectively, of [Bmim][I] in panel b.

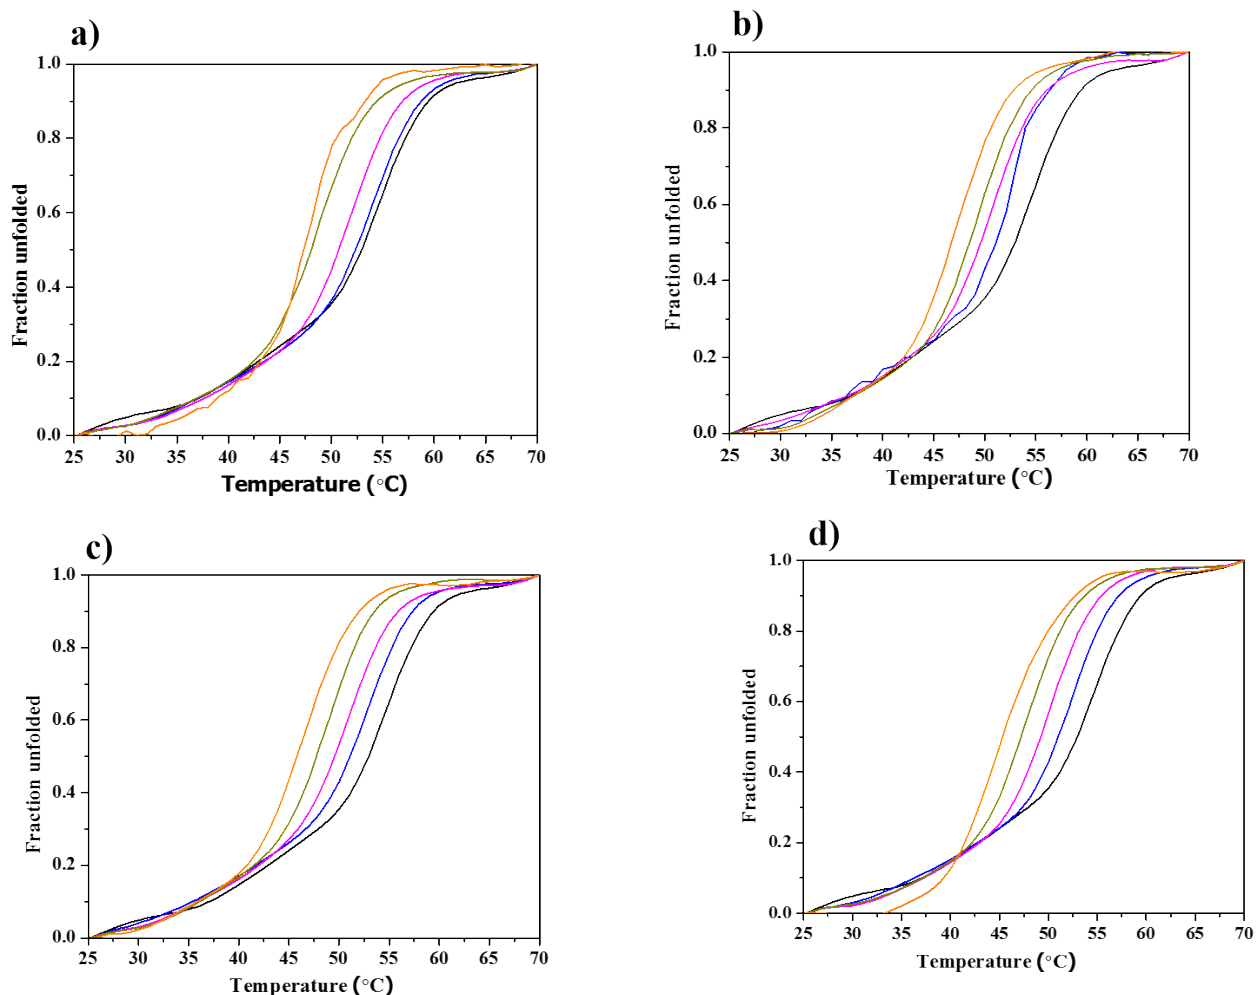

**Fig. S2** Fraction of unfolded  $\alpha$ -chymotrypsin (CT) in tris-HCl buffer in the presence of [Bmim][Br] + [Bmim][I] mixture. The blue, magenta, dark yellow and orange lines represent mole ratios of [Bmim][Br] + [Bmim][I] mixture as 0.025:0.1, 0.025:0.2, 0.025:0.3 and 0.025:0.4 M respectively, in panel a; 0.5:0.1, 0.5:0.2, 0.5:0.3 and 0.5:0.4 M respectively, in panel b; 0.1:0.1, 0.1:0.2, 0.1:0.3 and 0.1:0.4 M respectively, in panel c; 0.2:0.1, 0.2:0.2, 0.2:0.3 and 0.2:0.4 M respectively, in panel d. The black color line represents in all panels  $\alpha$ -chymotrypsin (CT) in tris-HCl buffer.

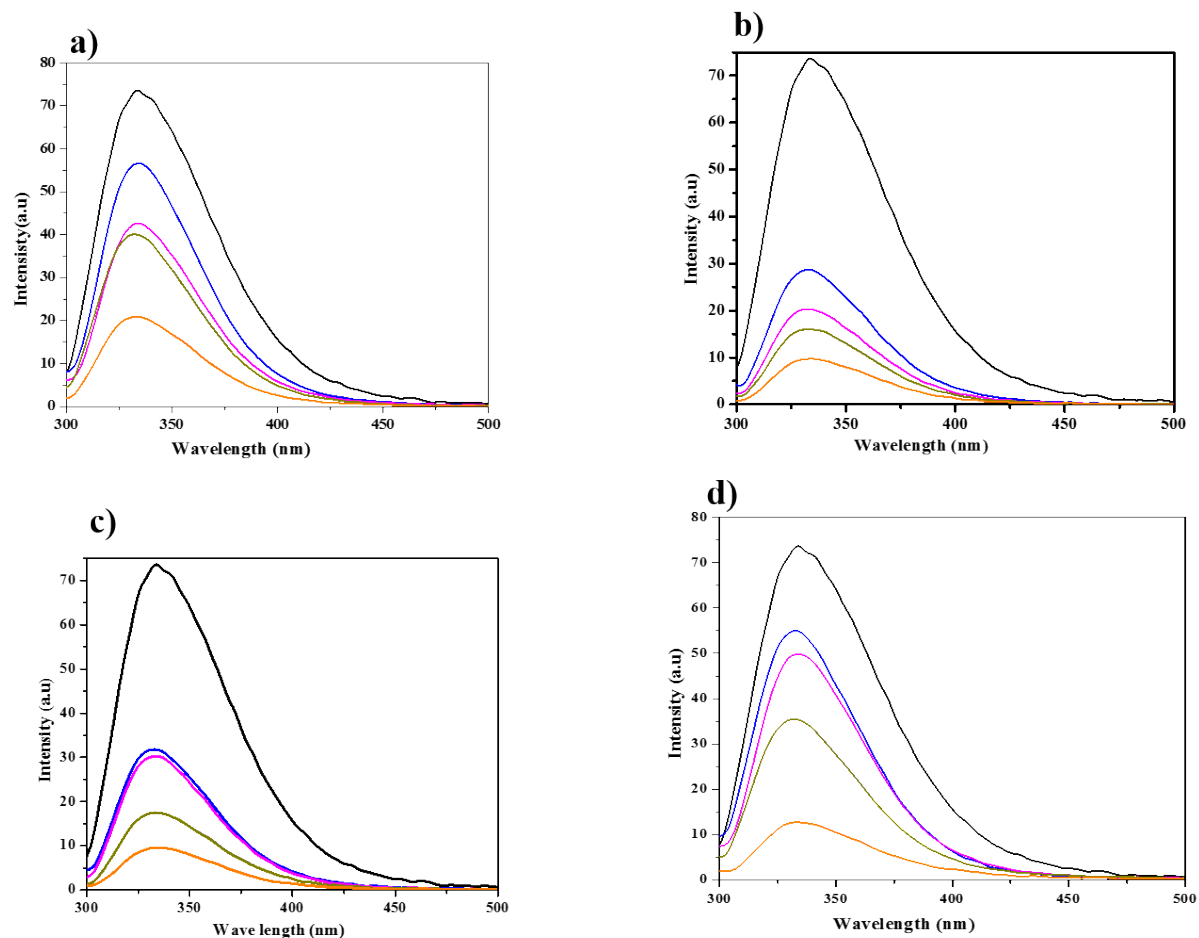

**Fig. S3** Fluorescence intensity changes for  $\alpha$ -chymotrypsin (CT) in tris-HCl buffer in the presence of [Bmim][Br] + [Bmim][I] mixture. The blue, magenta, dark yellow and orange lines represent mole ratios of [Bmim][Br] + [Bmim][I] mixture as 0.025:0.1, 0.025:0.2, 0.025:0.3 and 0.025:0.4 M respectively, in panel a; 0.5:0.1, 0.5:0.2, 0.5:0.3 and 0.5:0.4 M respectively, in panel b; 0.1:0.1, 0.1:0.2, 0.1:0.3 and 0.1:0.4 M respectively, in panel c; 0.2:0.1, 0.2:0.2, 0.2:0.3 and 0.2:0.4 M respectively, in panel d. The black color line represents in all panels  $\alpha$ -chymotrypsin (CT) in tris-HCl buffer.

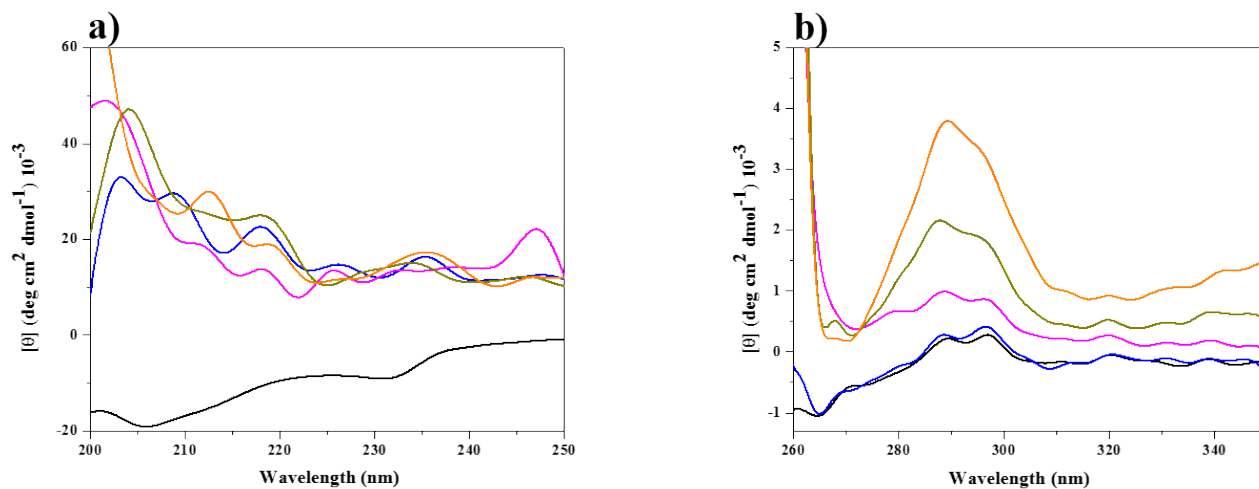

**Fig. S4** Far (a) and near (b) UV-CD spectra for  $\alpha$ -chymotrypsin (CT) in tris-HCl in the presence of presence of [Bmim][Br] + [Bmim][I] mixture. The blue, magenta, dark yellow and orange lines represent mole ratios of [Bmim][Br] + [Bmim][I] mixture as 0.025:0.1, 0.025:0.2, 0.025:0.3 and 0.025:0.4 M respectively, in panels a and b. The black color line represents in both the panels is  $\alpha$ -chymotrypsin (CT) in tris-HCl buffer.

**Table S1.** Transition temperature ( $T_m$ ), enthalpy change ( $\Delta H$ ) Gibbs free energy changes ( $\Delta G_u$ ) and heat capacity change ( $\Delta C_p$ ) at 25 °C for the  $\alpha$ -chymotrypsin (CT) in tris HCl in the presence of various concentrations of ionic liquids (ILs) and ionic liquid mixtures determined by fluorescence spectroscopy.<sup>a</sup>

| Sample                                  | $T_m$ /<br>°C | $\Delta H$ /<br>k Cal mol <sup>-1</sup> | $\Delta G_u$ /<br>k Cal mol <sup>-1</sup> | $\Delta C_p$ /<br>k Cal mol <sup>-1</sup> K <sup>-1</sup> |
|-----------------------------------------|---------------|-----------------------------------------|-------------------------------------------|-----------------------------------------------------------|
| Buffer                                  | 53.1          | 55.76                                   | 4.01                                      | 1.04                                                      |
| 0.025 M [Bmim][Br]                      | 53.5          | 59.63                                   | 4.31                                      | 1.10                                                      |
| 0.05 M [Bmim][Br]                       | 53.3          | 52.93                                   | 3.81                                      | 0.98                                                      |
| 0.1 M [Bmim][Br]                        | 53.1          | 58.90                                   | 4.24                                      | 1.10                                                      |
| 0.15 M [Bmim][Br]                       | 52.9          | 55.42                                   | 3.98                                      | 1.03                                                      |
| 0.2 M [Bmim][Br]                        | 52.4          | 61.01                                   | 4.34                                      | 1.15                                                      |
| 0.25 M [Bmim][Br]                       | 51.8          | 60.31                                   | 4.25                                      | 1.15                                                      |
| 0.3 M [Bmim][Br]                        | 51.6          | 62.93                                   | 4.41                                      | 1.20                                                      |
| 0.6 M [Bmim][Br]                        | 49.1          | 64.67                                   | 4.34                                      | 1.31                                                      |
| 0.025 M[Bmim][I]                        | 52.3          | 57.82                                   | 4.10                                      | 1.09                                                      |
| 0.05 M[Bmim][I]                         | 52.2          | 66.39                                   | 4.71                                      | 1.26                                                      |
| 0.1 M[Bmim][I]                          | 52.1          | 57.18                                   | 4.05                                      | 1.09                                                      |
| 0.2 M[Bmim][I]                          | 50.6          | 97.70                                   | 5.74                                      | 1.92                                                      |
| 0.3 M[Bmim][I]                          | 49.3          | 66.08                                   | 4.45                                      | 1.33                                                      |
| 0.4 M[Bmim][I]                          | 45.6          | 67.44                                   | 4.23                                      | 1.48                                                      |
| 0.6 M[Bmim][I]                          | 44.5          | 54.48                                   | 3.35                                      | 1.23                                                      |
| 0.025 M [Bmim][Br] +<br>0.1 M [Bmim][I] | 52.3          | 61.97                                   | 4.36                                      | 1.18                                                      |
| 0.025 M [Bmim][Br] +<br>0.2 M [Bmim][I] | 50.6          | 64.71                                   | 4.46                                      | 1.27                                                      |
| 0.025 M [Bmim][Br] +<br>0.3 M [Bmim][I] | 48.2          | 65.50                                   | 4.48                                      | 1.31                                                      |
| 0.025 M [Bmim][Br] +<br>0.6 M [Bmim][I] | 47.4          | 88.32                                   | 5.75                                      | 1.86                                                      |

|                     |      |       |      |      |
|---------------------|------|-------|------|------|
| 0.4 M [Bmim][I]     |      |       |      |      |
| 0.05 M [Bmim][Br] + | 51.1 | 83.64 | 5.82 | 1.63 |
| 0.1 M [Bmim][I]     |      |       |      |      |
| 0.05 M [Bmim][Br] + | 49.5 | 64.98 | 4.39 | 1.31 |
| 0.2 M [Bmim][I]     |      |       |      |      |
| 0.05 M [Bmim][Br] + | 48.5 | 69.71 | 4.63 | 1.43 |
| 0.3 M [Bmim][I]     |      |       |      |      |
| 0.05 M [Bmim][Br] + | 46.6 | 70.84 | 4.54 | 1.52 |
| 0.4 M [Bmim][I]     |      |       |      |      |
| 0.1 M [Bmim][Br] +  | 51.1 | 62.55 |      |      |
| 0.1 M [Bmim][I]     |      |       | 4.35 | 1.21 |
| 0.1 M [Bmim][Br] +  | 49.6 | 62.46 |      |      |
| 0.2 M [Bmim][I]     |      |       | 4.23 | 1.25 |
| 0.1 M [Bmim][Br] +  | 47.7 | 67.16 |      |      |
| 0.3 M [Bmim][I]     |      |       | 4.39 | 1.40 |
| 0.1 M [Bmim][Br] +  | 45.8 | 67.44 |      |      |
| 0.4 M [Bmim][I]     |      |       | 4.19 | 1.49 |
| 0.2 M [Bmim][Br] +  | 51.1 | 67.88 |      |      |
| 0.1 M [Bmim][I]     |      |       | 4.72 | 1.32 |
| 0.2 M [Bmim][Br] +  | 49.2 | 69.53 |      |      |
| 0.2 M [Bmim][I]     |      |       | 4.68 | 1.41 |
| 0.2 M [Bmim][Br] +  | 47.2 | 69.66 |      |      |
| 0.3 M [Bmim][I]     |      |       | 4.51 | 1.47 |
| 0.2 M [Bmim][Br] +  | 45.3 | 64.89 |      |      |
| 0.4 M [Bmim][I]     |      |       | 4.05 | 1.43 |

---

<sup>a</sup>Each Value is the average over three measurements. The error in  $T_m$  doesnot exceeds 0.1°C. The estimated relative uncertainties in ( $\Delta H$ ), ( $\Delta C_p$ ) and ( $\Delta G_u$ ) are around 2% of the reported values.
